# Supplementary material for: Biodegradable copper complexing polymeric microparticles relieve oxidative stress
Source: Royal Society of Chemistry journal article supplement (doi:10.1039/d5lp00289c), 2026-01-01
Supplement: d5lp00289c1.pdf [file d5lp00289c1.pdf]

## SUPPORTING INFORMATION

### Biodegradable Copper Complexing Polymeric Microparticles Relieve Oxidative Stress

Laurel Zhang<sup>1</sup>, Cole Latvis<sup>1</sup>, Xiaokun Jiang<sup>1</sup>, Yadong Wang<sup>1\*</sup>, and Simon Van Herck<sup>1,2\*</sup>

<sup>1</sup> Meinig School of Biomedical Engineering, Cornell University, Ithaca, NY, 14850, USA

<sup>2</sup> Department of Instructive Biomaterials Engineering, MERLN Institute for Technology-Inspired Regenerative Medicine, Maastricht University, the Netherlands

\* Corresponding Author

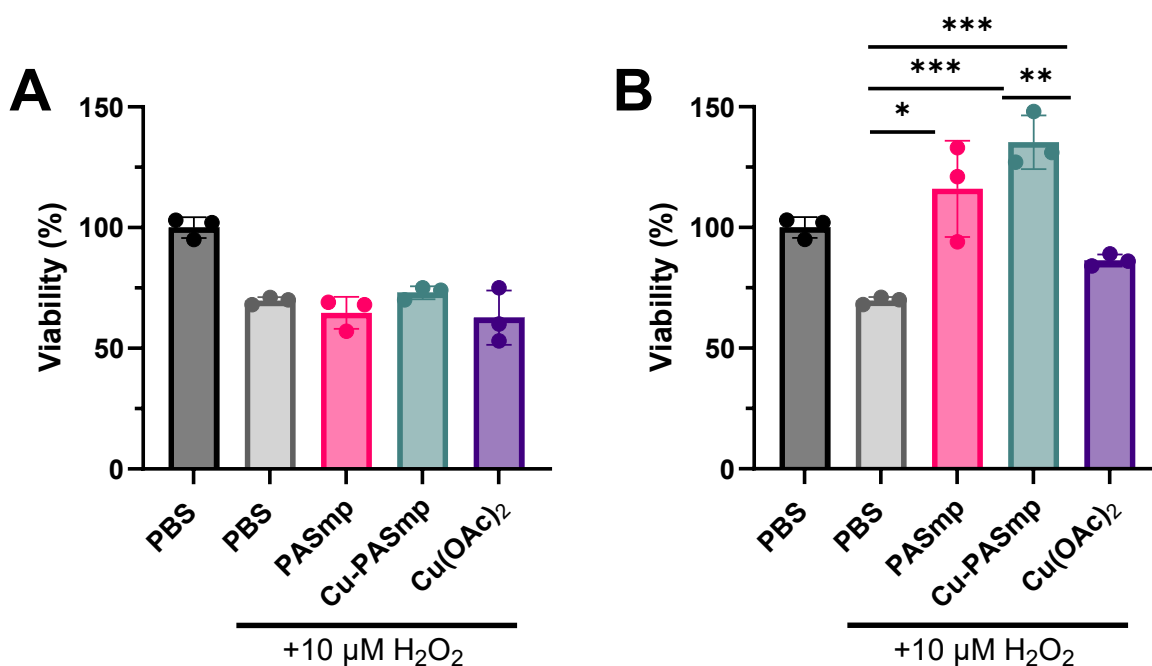

**Figure S1:** Cellular viability of HCF exposed to simulated oxidative stress at 10  $\mu\text{M}$   $\text{H}_2\text{O}_2$  upon incubation with 30  $\mu\text{g/mL}$  (A) and 300  $\mu\text{g/mL}$  (B) of PASmp and Cu-PASmp, and equivalent  $\text{Cu}(\text{OAc})_2$  (6 or 60  $\mu\text{M}$ , respectively) for 24h assessed via MTT assay. At low concentration, 30  $\mu\text{g/mL}$ , oxidative rescue is absent. While at 300  $\mu\text{g/mL}$  both PASmp and Cu-PASmp demonstrate a relief in cytotoxicity by alleviating the oxidative stress conditions. Data in (A) and (B), represent mean  $\pm$  SD ( $n=3$ ). Significant difference was determined by Welch's  $t$ -test: \* for  $p < 0.05$ , \*\* for  $p < 0.01$ , and \*\*\* for  $p < 0.001$ .

SET 4:

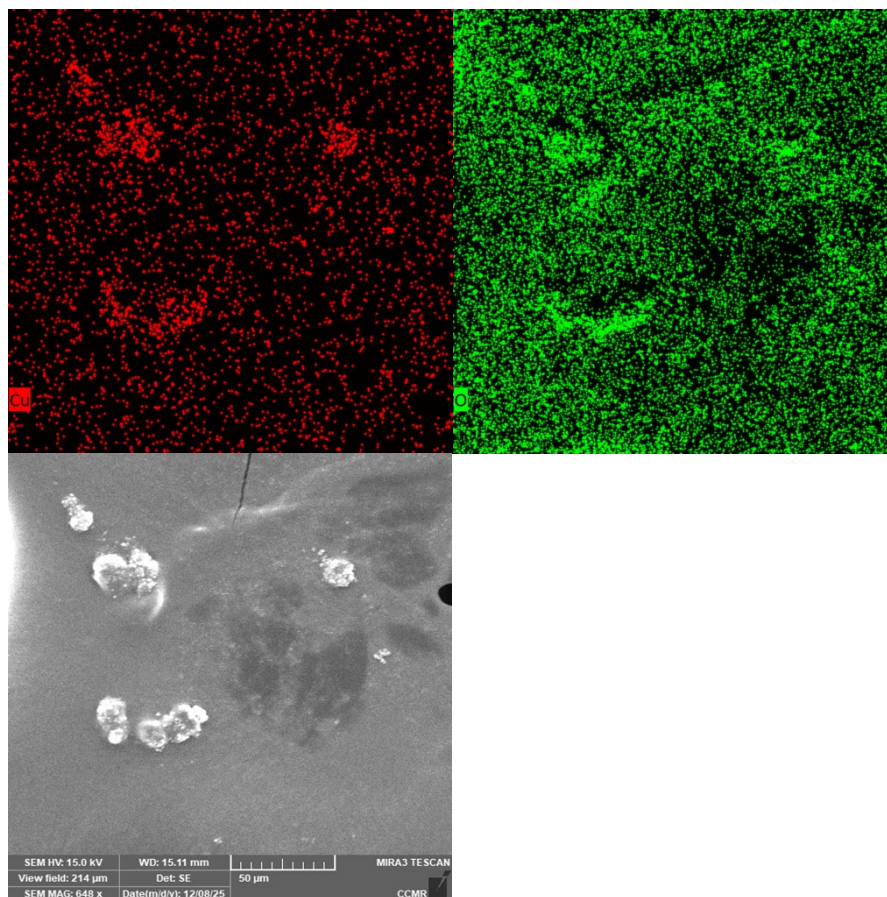

Figure S2: EDS elemental composition mapping of Cu-PASmp showed an accumulated signaling of copper (red) and oxygen (green) around the microparticles (SEM image). Background signaling for oxygen is very high due to oxygen presence in the used tape.

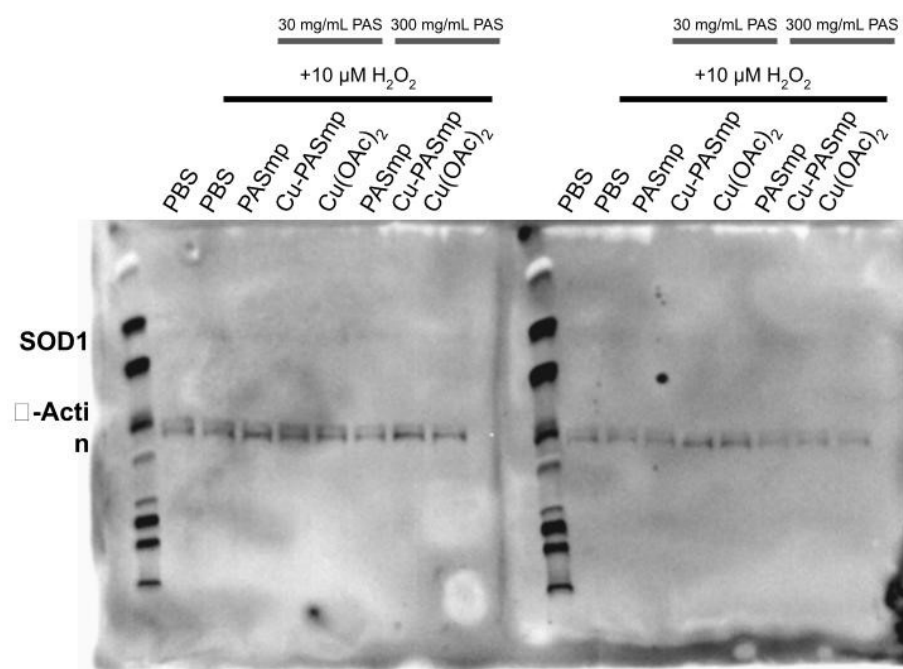

Figure S3: Unprocessed and uncropped western blot gel for detection of SOD1 expression.
